# Supplementary material
Source: PubMed Central journal article supplement (PMC9483000)

**Appendix**  
**Trends in U.S. Depression Prevalence From 2015–2020: The Widening Treatment Gap**  
**Goodwin et al.**

Appendix Figure 1. Prevalence of past-year depression in the US from 2015 to 2020 by gender

Appendix Figure 2. Prevalence of past-year depression in the US from 2015 to 2020 by marital status

Appendix Figure 3. Prevalence of past-year depression in the US from 2015 to 2020 by annual family income

Appendix Figure 4. Prevalence of past-year depression in the US from 2015 to 2020 by education

Appendix Figure 5. Prevalence of help-seeking among those with past-year depression in the US from 2015 to 2020 by age group

Appendix Figure 6. Prevalence of medication treatment for depression among those with past-year depression in the US from 2015 to 2020 by age group

Appendix Figure 7. Prevalence of help-seeking and medication treatment for depression among those with past-year depression in the US from 2015 to 2020 by gender

RR, relative risk.

\*Statistical significance at  $p < 0.05$ .

**Appendix**  
**Trends in U.S. Depression Prevalence From 2015–2020: The Widening Treatment Gap**  
**Goodwin et al.**

**Appendix Figure 1.** Prevalence of past-year depression in the US from 2015 to 2020 by gender.

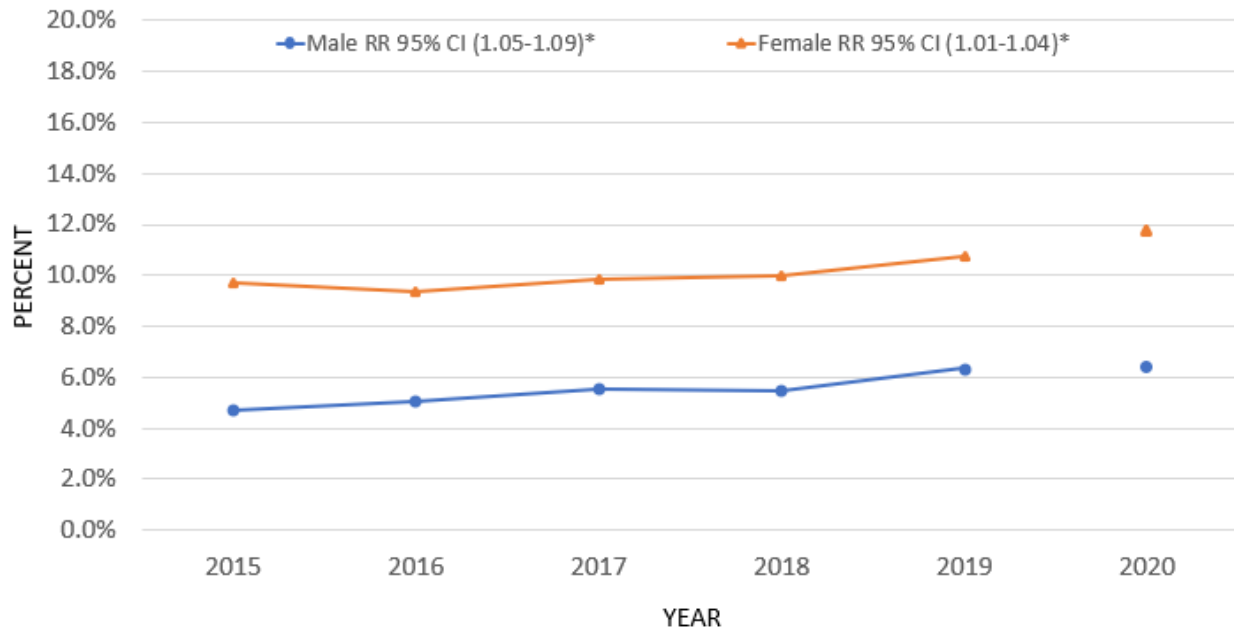

**Appendix Figure 2.** Prevalence of past-year depression in the US from 2015 to 2020 by marital status.

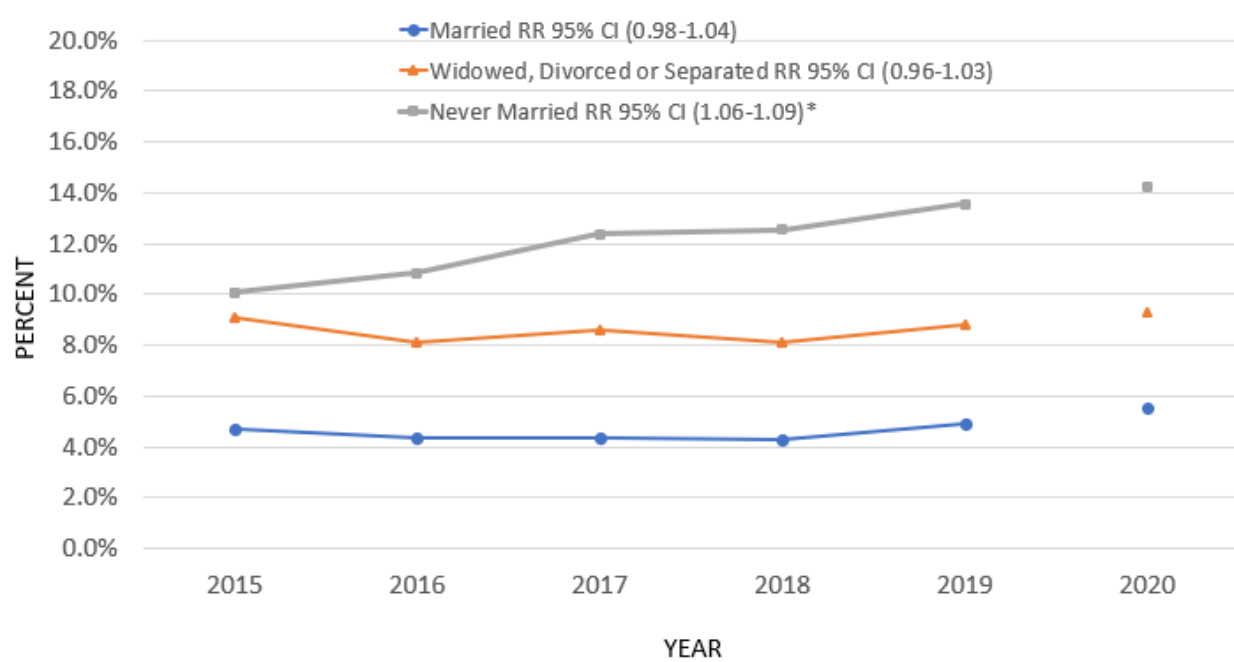

**Appendix**  
**Trends in U.S. Depression Prevalence From 2015–2020: The Widening Treatment Gap**  
**Goodwin et al.**

**Appendix Figure 3.** Prevalence of past-year depression in the US from 2015 to 2020 by annual family income.

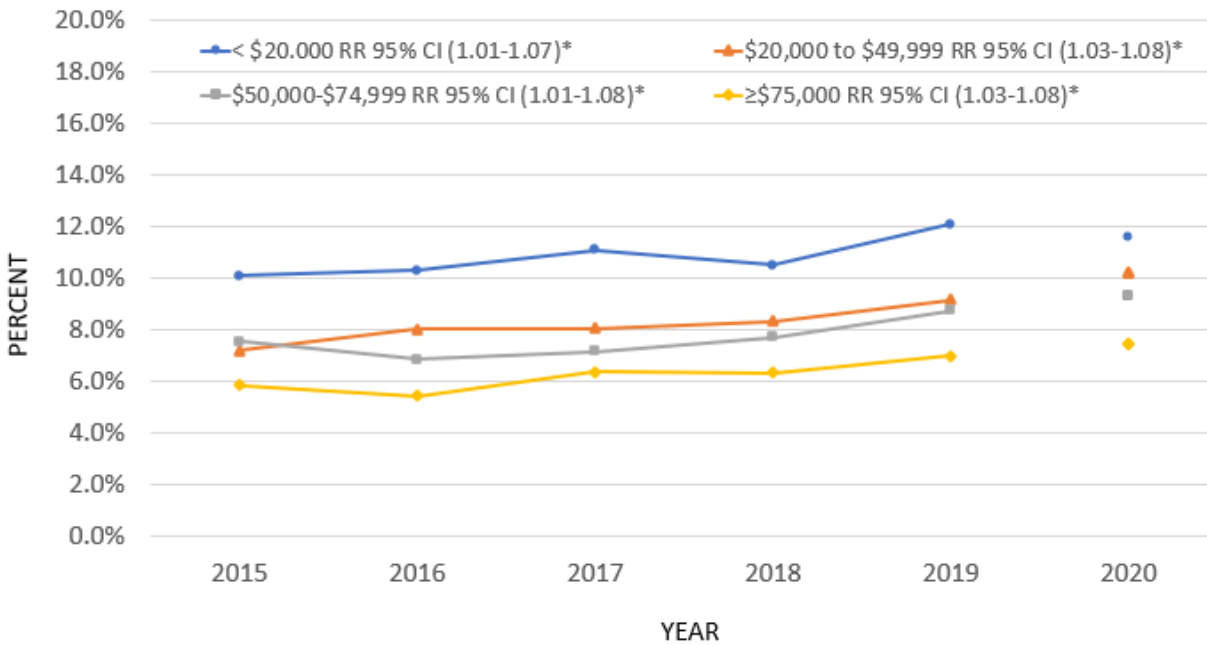

**Appendix Figure 4.** Prevalence of past-year depression in the US from 2015 to 2020 by education.

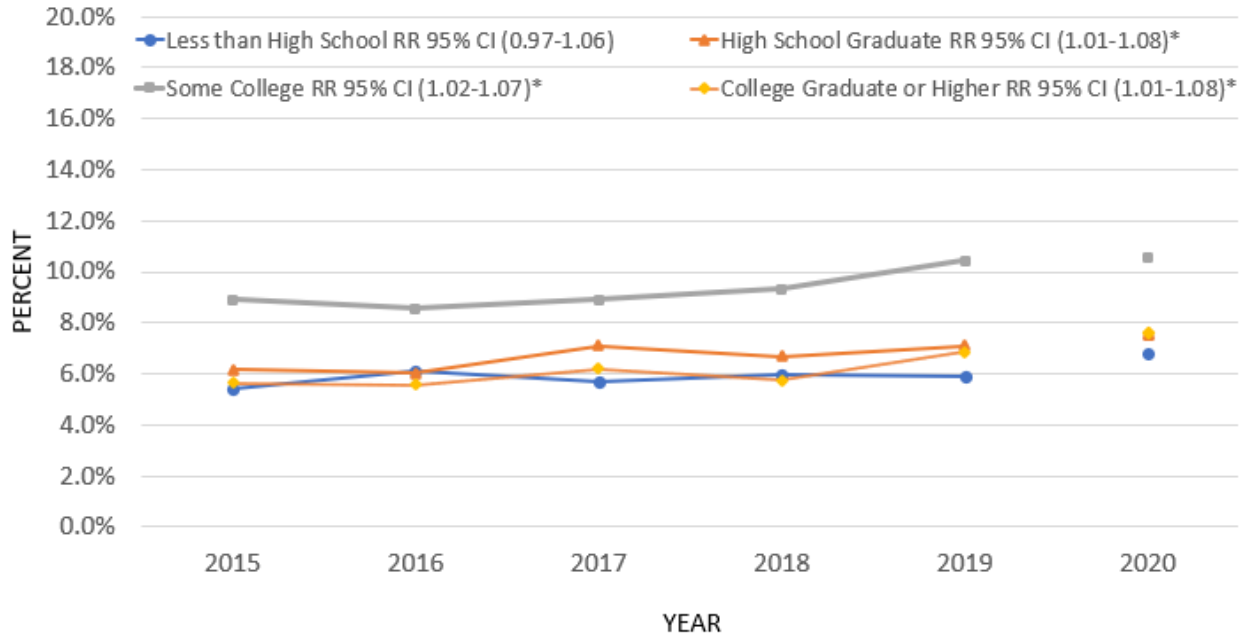

**Appendix**  
**Trends in U.S. Depression Prevalence From 2015–2020: The Widening Treatment Gap**  
**Goodwin et al.**

**Appendix Figure 5.** Prevalence of talking with a medical professional among those with past-year depression in the US from 2015 to 2020 by age group.

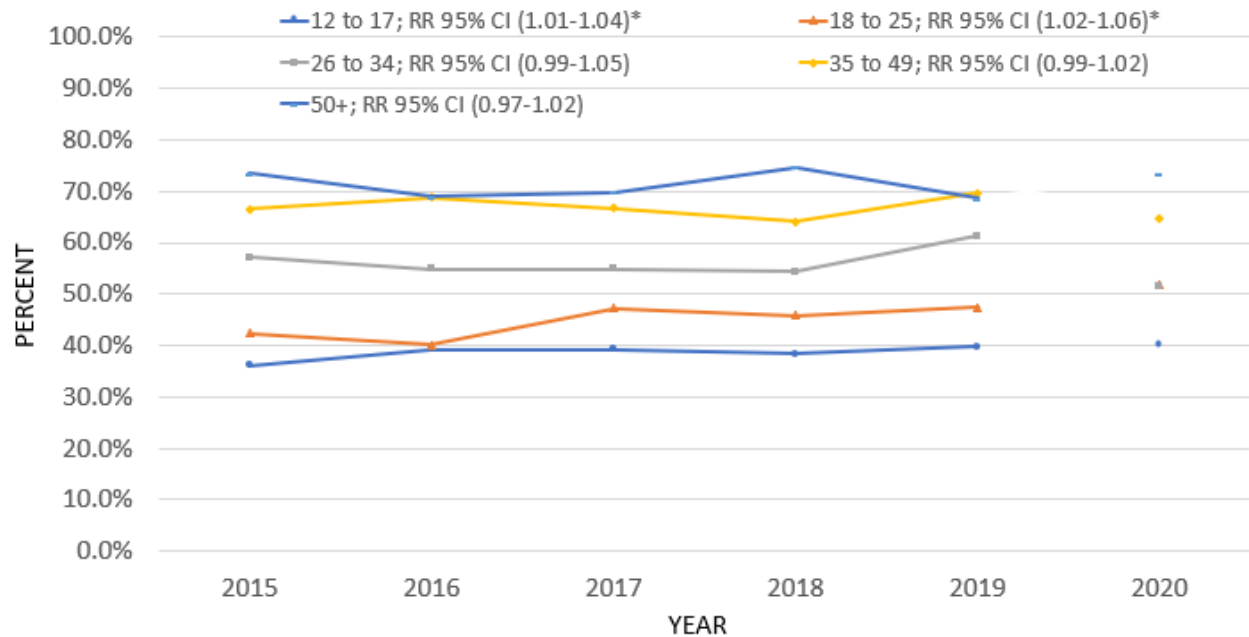

**Appendix Figure 6.** Prevalence of medication prescription for depression among those with past-year depression in the US from 2015 to 2020 by age group.

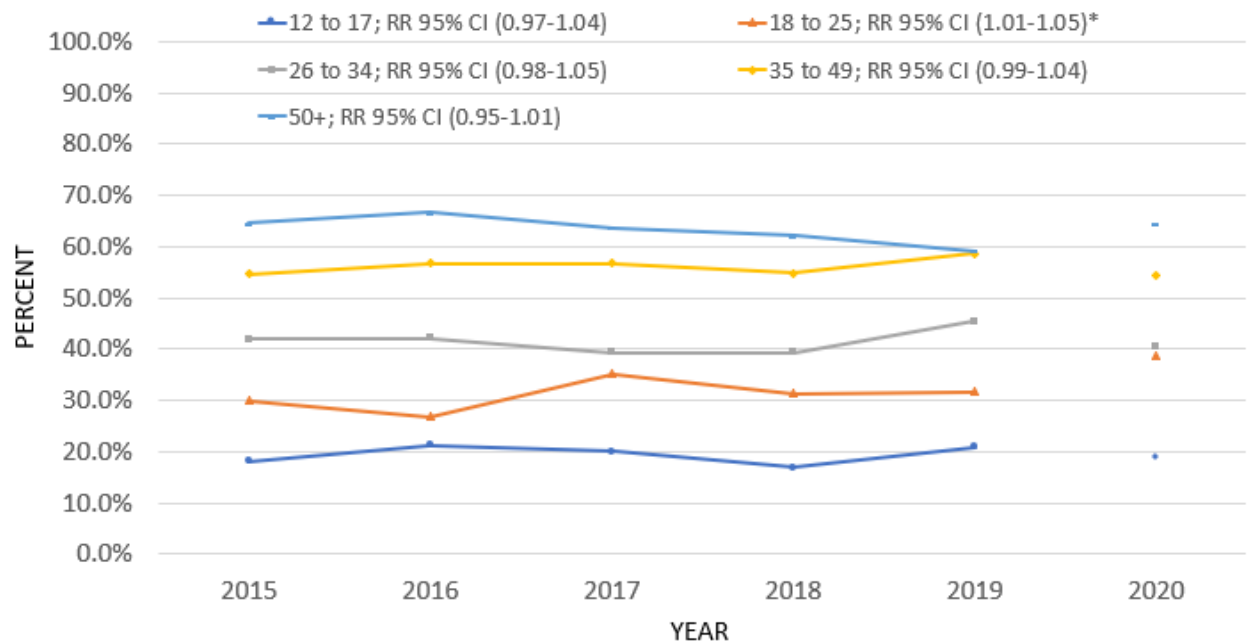

**Appendix**  
**Trends in U.S. Depression Prevalence From 2015–2020: The Widening Treatment Gap**  
**Goodwin et al.**

**Appendix Figure 7.** Prevalence of talking with a medical professional and medication prescription for depression among those with past-year depression in the US from 2015 to 2020 by gender.

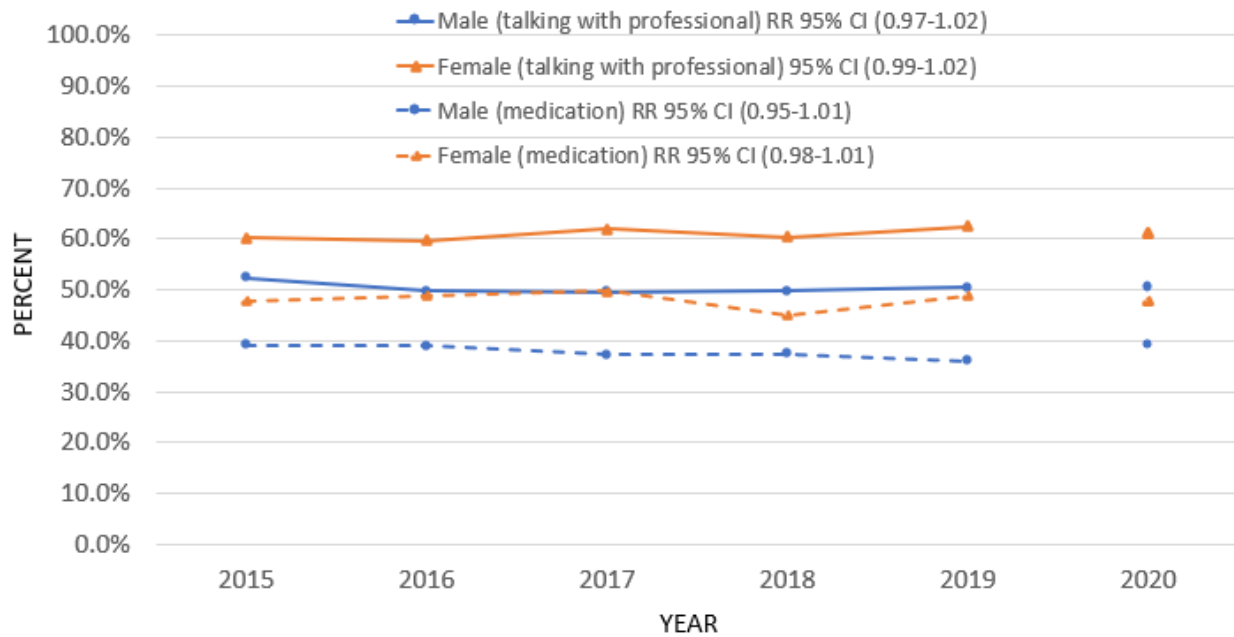

Supplement: mmc1.pdf [file mmc1.pdf]
